# Supplementary material for: Decisions on the allocation of intensive care resources in the context of the COVID-19 pandemic: Clinical and ethical recommendations of DIVI, DGINA, DGAI, DGIIN, DGNI, DGP, DGP and AEM
Source: Med Klin Intensivmed Notfmed. 2020 Jul 29;115(Suppl 3):115–22. doi: 10.1007/s00063-020-00709-9 (PMC7387419; doi:10.1007/s00063-020-00709-9)
Supplement: Supplementary file 1 — Fig. 1 Documentation support for prioritisation in case of resource scarcity [file 63_2020_709_MOESM1_ESM.pdf]

**Fig. 1 Documentation support** for prioritisation in case of resource scarcity

|                                                                                                                                                                                                                                                                                                                                                                                                                                                                                                                                           |                                                                                                                                                                                                                                                                                                                                                                                                                                                                                                                                                                                                                               |
|-------------------------------------------------------------------------------------------------------------------------------------------------------------------------------------------------------------------------------------------------------------------------------------------------------------------------------------------------------------------------------------------------------------------------------------------------------------------------------------------------------------------------------------------|-------------------------------------------------------------------------------------------------------------------------------------------------------------------------------------------------------------------------------------------------------------------------------------------------------------------------------------------------------------------------------------------------------------------------------------------------------------------------------------------------------------------------------------------------------------------------------------------------------------------------------|
| <b>Patient label</b>                                                                                                                                                                                                                                                                                                                                                                                                                                                                                                                      | <b>Team members (Name/Function)</b><br><br><br>                                                                                                                                                                                                                                                                                                                                                                                                                                                                                                                                                                               |
| <b>Date/Time</b>                                                                                                                                                                                                                                                                                                                                                                                                                                                                                                                          | Clinical ethics involved? yes <input type="checkbox"/> /no <input type="checkbox"/>                                                                                                                                                                                                                                                                                                                                                                                                                                                                                                                                           |
| <b>Need</b> for intensive care therapy                                                                                                                                                                                                                                                                                                                                                                                                                                                                                                    |                                                                                                                                                                                                                                                                                                                                                                                                                                                                                                                                                                                                                               |
| <b>Evaluation of clinical prospect of success</b> of intensive care therapy                                                                                                                                                                                                                                                                                                                                                                                                                                                               |                                                                                                                                                                                                                                                                                                                                                                                                                                                                                                                                                                                                                               |
| <u>Current illness</u>                                                                                                                                                                                                                                                                                                                                                                                                                                                                                                                    | <u>General health status</u> (prior to current illness)                                                                                                                                                                                                                                                                                                                                                                                                                                                                                                                                                                       |
| Prognosis score <sup>1)</sup>                                                                                                                                                                                                                                                                                                                                                                                                                                                                                                             | General health score <sup>2)</sup>                                                                                                                                                                                                                                                                                                                                                                                                                                                                                                                                                                                            |
| <div>SCORE</div> <div>PTs</div>                                                                                                                                                                                                                                                                                                                                                                                                                                                                                                           | <div>SCORE</div> <div>PTs</div>                                                                                                                                                                                                                                                                                                                                                                                                                                                                                                                                                                                               |
| according <b>to relevant clinical measure</b> ; 1) e.g. SOFA, APACHE II or CRB-65; 2) e.g. Clinical Frailty Scale CFS or ECOG                                                                                                                                                                                                                                                                                                                                                                                                             |                                                                                                                                                                                                                                                                                                                                                                                                                                                                                                                                                                                                                               |
| <u>Comorbidities</u>                                                                                                                                                                                                                                                                                                                                                                                                                                                                                                                      | <b>Patient's wishes</b>                                                                                                                                                                                                                                                                                                                                                                                                                                                                                                                                                                                                       |
| Reducing the chance of surviving intensive care due to severity or combination:<br><input type="checkbox"/> severe organ dysfunction<br><div><input type="checkbox"/> heart   <input type="checkbox"/> lung   <input type="checkbox"/> liver   <input type="checkbox"/> kidney</div> <input type="checkbox"/> advanced neurological disease<br><input type="checkbox"/> advanced oncological disease<br><input type="checkbox"/> severe and irreversible immune deficiency<br><input type="checkbox"/> multimorbidity<br><b>Comments:</b> | Conversation with patient (current wishes) <input type="checkbox"/><br>Advance directive available?   yes <input type="checkbox"/> /no <input type="checkbox"/><br>Power of attorney available?   yes <input type="checkbox"/> /no <input type="checkbox"/><br><br>Conversation with<br><input type="checkbox"/> <i>legal representative:</i><br><div><input type="checkbox"/> <i>Relatives (if no legal representative appointed)</i></div><br><input type="checkbox"/> No consent to intensive care<br><input type="checkbox"/> Consent to intensive care<br><input type="checkbox"/> Patient's wishes cannot be determined |
| <b>TRIAGE Result</b>                                                                                                                                                                                                                                                                                                                                                                                                                                                                                                                      |                                                                                                                                                                                                                                                                                                                                                                                                                                                                                                                                                                                                                               |
| <u>Intensive Care</u>                                                                                                                                                                                                                                                                                                                                                                                                                                                                                                                     | <u>Non-Intensive Care</u>                                                                                                                                                                                                                                                                                                                                                                                                                                                                                                                                                                                                     |
| <input type="checkbox"/> ICU <input type="checkbox"/> Intermediate Care                                                                                                                                                                                                                                                                                                                                                                                                                                                                   | <input type="checkbox"/> General Ward <input type="checkbox"/> Palliative Care                                                                                                                                                                                                                                                                                                                                                                                                                                                                                                                                                |
| <b>RE-EVALUATION</b> on (Date/Time):                                                                                                                                                                                                                                                                                                                                                                                                                                                                                                      |                                                                                                                                                                                                                                                                                                                                                                                                                                                                                                                                                                                                                               |
| Assessment of clinical course of disease:                                                                                                                                                                                                                                                                                                                                                                                                                                                                                                 |                                                                                                                                                                                                                                                                                                                                                                                                                                                                                                                                                                                                                               |
| Continuation or withdrawal of therapy because:                                                                                                                                                                                                                                                                                                                                                                                                                                                                                            |                                                                                                                                                                                                                                                                                                                                                                                                                                                                                                                                                                                                                               |
